# Supplementary material for: Targeted DNA excision in Arabidopsis by a re-engineered homing endonuclease
Source: PubMed Central journal article supplement (PMC3536558; doi:10.1186/1472-6750-12-86), 2012-11-13

Supplemental Figure 1.

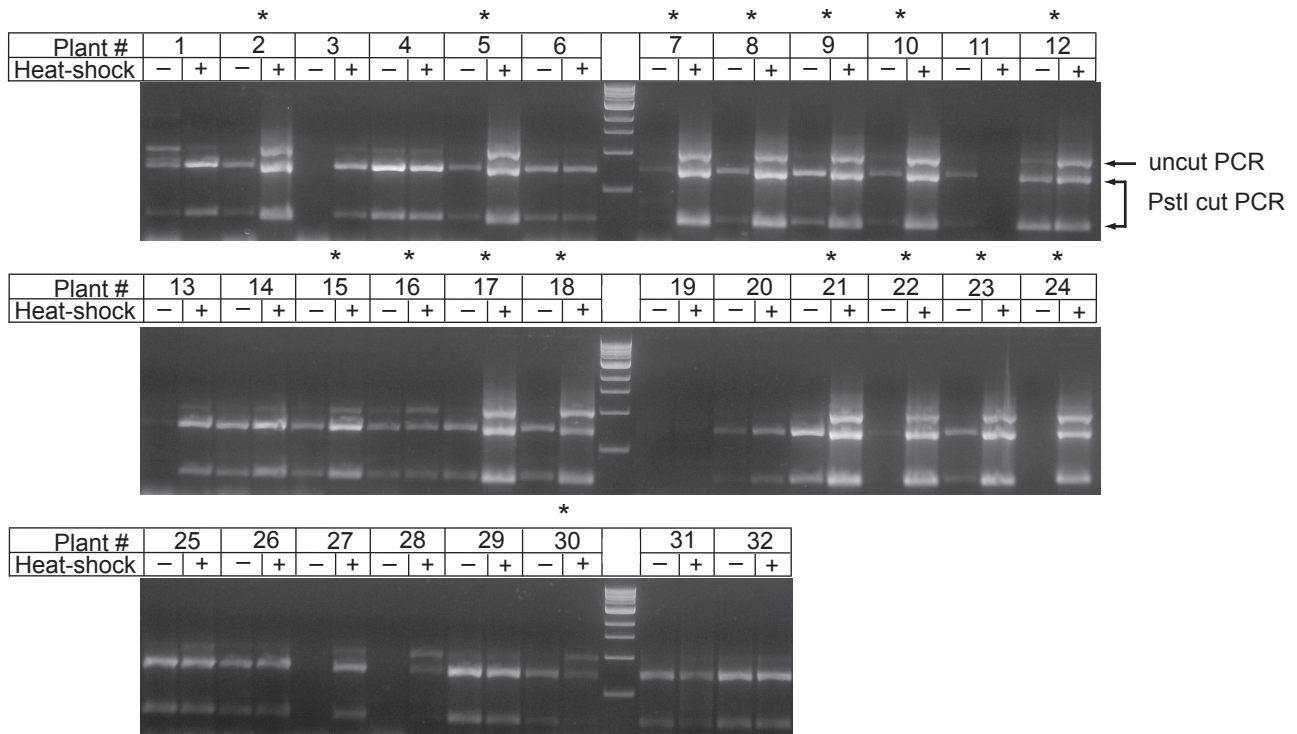

Supplement: 1472-6750-12-86-S1.pdf [file 1472-6750-12-86-S1.pdf]
