# Supplementary material for: Targeted DNA excision in Arabidopsis by a re-engineered homing endonuclease
Source: PubMed Central journal article supplement (PMC3536558; doi:10.1186/1472-6750-12-86), 2012-11-13
Supplement: 1472-6750-12-86-S3.pdf [file 1472-6750-12-86-S3.pdf]

**Supplementary Table 1.** DNA sequences of individual clones containing PCR-amplified repair junctions from ten different plants following BAR expression cassette removal.

| DNA Sequence                                               | Plant Number | Number of Clones |
|------------------------------------------------------------|--------------|------------------|
| GAGGATCCTCCGGGTCGTACGACCCGGAGGTACCGAGCTCGAATTCGTAATCATGT   | 1            | 2                |
| GAGGATCCTCCGGGTCG.....GAATTCGTAATCATGT                     | 1            | 3                |
| GAGGATCCTCCGGGTCGTAC.....CGAGCTCGAATTCGTAATCATGT           | 1            | 5                |
| GAGGATCCTCCGGGTCGTAC.....CGAGCTCGAATTCGTAATCATGT           | 1            | 6                |
| GAG.....CTCGAATTCGTAATCATGT                                | 1            | 7                |
| GAGGATCCTCCG.....AGCTCGAATTCGTAATCATGT                     | 2            | 1                |
| GAGGATCCTCCG.....AGCTCGAATTCGTAATCATGT                     | 2            | 2                |
| GAGGATCCTCCGGGTCGTA.....ATCATGT                            | 2            | 3                |
| GAGGATCCTCCG.....AGCTCGAATTCGTAATCATGT                     | 2            | 4                |
| GAGGATCCTCCG.....AGCTCGAATTCGTAATCATGT                     | 2            | 6                |
| GAGGATCCTCCG.....AGCTCGAATTCGTAATCATGT                     | 2            | 8                |
| GAGGATCCTCCGGGTCGTAC.....CGAGCTCGAATTCGTAATCATGT           | 5            | 1                |
| GAGGATCCTCCGGGTCGTA.....ATCATGT                            | 5            | 3                |
| GAGGATCCTCCGGGTCGTAC.....CGAGCTCGAATTCGTAATCATGT           | 5            | 4                |
| GAGGATCCTCCGGGTCGTA.....ATCATGT                            | 5            | 5                |
| GAGGATCCTCCGGGTCGTAC.....47bp                              | 5            | 8                |
| GAGGATCCTCCG.....AGCTCGAATTCGTAATCATGT                     | 8            | 1                |
| GAGGATCCTCCG.....AGCTCGAATTCGTAATCATGT                     | 8            | 2                |
| GAGGATCCTCCG.....AGCTCGAATTCGTAATCATGT                     | 8            | 3                |
| GAGGATCCTCCG.....AGCTCGAATTCGTAATCATGT                     | 8            | 5                |
| GAGGATCCTCCG.....AGCTCGAATTCGTAATCATGT                     | 8            | 7                |
| GAGGATCCTCCG.....AGCTCGAATTCGTAATCATGT                     | 8            | 8                |
| GAGGATCCTCCGG.....AGGTACCGAGCTCGAATTCGTAATCATGT            | 9            | 1                |
| GAGGATCCTCCGGGTCGTA.....ATCATGT                            | 9            | 3                |
| GAGGATCCTCCGG.....AGGTACCGAGCTCGAATTCGTAATCATGT            | 9            | 4                |
| GAGGATCCTCCGGGTCGTAC.....CCGGAGGTACCGAGCTCGAATTCGTAATCATGT | 9            | 5                |
| GAGGATCCTCCGGGTCGTAC.....CGAGCTCGAATTCGTAATCATGT           | 9            | 7                |

|                                                          |    |    |
|----------------------------------------------------------|----|----|
| GAGGATCCTCCGGGTCGTACGACCCGGAGGTACCGAGCTCGAATTCGTAATCATGT | 9  | 8  |
| GAGGATCCTCCG.....AGCTCGAATTCGTAATCATGT                   | 10 | 2  |
| GAGGATCCTCCGGGTCGTACGACCCGGAGGTACCGAGCTCGAATTCGTAATCATGT | 10 | 3  |
| GAGGATCCTCCG.....AGCTCGAATTCGTAATCATGT                   | 10 | 3* |
| GAGGATCCTCCGGGTCGTACGACCCGGAGGTACCGAGCTCGAATTCGTAATCATGT | 10 | 4  |
| GAGGATCCTCCGGGTCGTA.....ATCATGT                          | 10 | 5  |
| GAGGATCCTCCGGGTCGTA.....ATCATGT                          | 11 | 4  |
| GAGGATCCTCCGGGTCGTAC.....CGAGCTCGAATTCGTAATCATGT         | 11 | 5  |
| GAGGATCCTCCGGGTCGTA.....ATCATGT                          | 11 | 6  |
| GAGGATCCTCCGGGTCGTACGACCCGGAGGTACCGAGCTCGAATTCGTAATCATGT | 11 | 7  |
| GAGGATCCTCCGGGTCGTA.....ATCATGT                          | 11 | 8  |
| GAGGATC.....TACCGAGCTCGAATTCGTAATCATGT                   | 15 | 1  |
| GAGGATCCTCCGGGT.....atCGAGCTCGAATTCGTAATCATGT            | 15 | 3  |
| GAGGATCCTCCG.....AGCTCGAATTCGTAATCATGT                   | 20 | 2  |
| GA.....GCTCGAATTCGTAATCATGT                              | 23 | 3  |
| GAGGATCCTCCGGGTCGTAC.....CGAGCTCGAATTCGTAATCATGT         | 23 | 4  |
| GAGGATCCTCCGGGTCGTAC.....CGAGCTCGAATTCGTAATCATGT         | 23 | 5  |
| GAGGATCCTCCGGGTCGTAC.....CGAGCTCGAATTCGTAATCATGT         | 23 | 6  |
